# Supplementary material for: Dysregulation of AMPA Receptor Trafficking and Intracellular Vesicular Sorting in the Prefrontal Cortex of Dopamine Transporter Knock-Out Rats
Source: MDPI journal article supplement (doi:10.3390/biom13030516), 2023-03-11
Supplement: s1 [file s1]

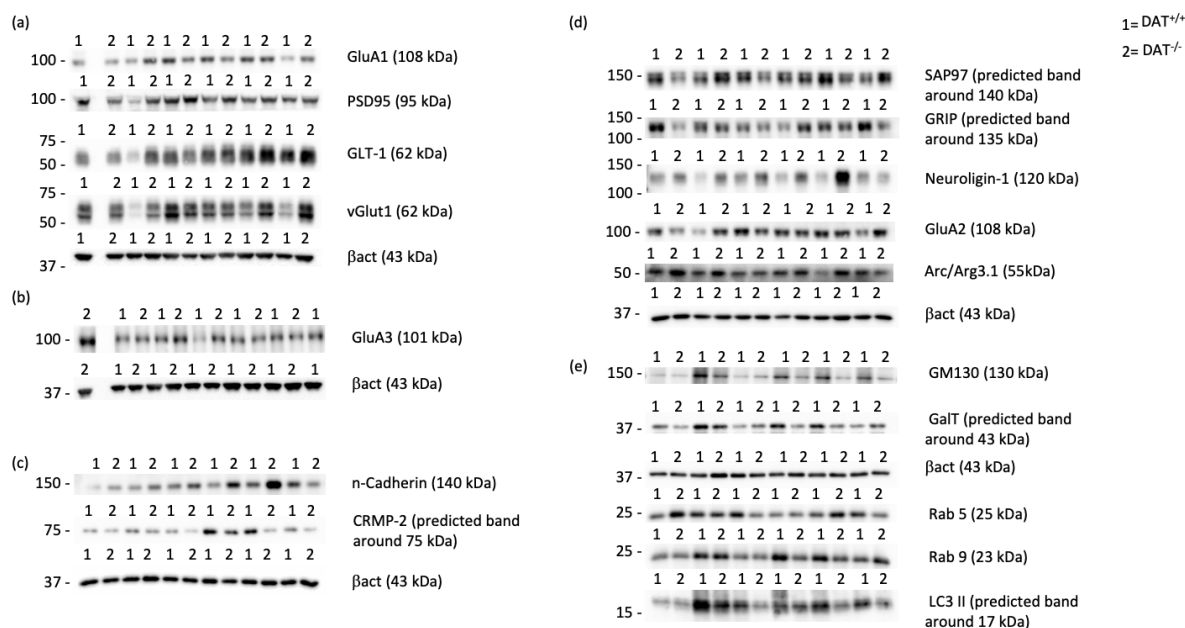

**Figure S1.** (a) Examples of full-size cropped immunoblots related to the expression levels of GluA1 (108 kDa), PSD95 (95 kDa), GLT-1 (62 kDa), vGlut1 (62 kDa) and  $\beta$ act (43 kDa); (b) example of full-size cropped immunoblots related to the expression levels of GluA3 (101 kDa) and  $\beta$ act (43 kDa); (c) example of full-size cropped immunoblots related to the expression levels of n-Cadherin (140 kDa), CRMP-2 (predicted band around 75 kDa) and  $\beta$ act (43 kDa); (d) example of full-size cropped immunoblots related to the expression levels of SAP97 (predicted band at 140 kDa), GRIP (predicted band at 135 kDa), Neuroligin-1 (120 kDa), GluA2 (120 kDa), Arc/Arg3.1 (55 kDa) and  $\beta$ act (43 kDa); (e) example of full-size cropped immunoblots related to the expression levels of GM130 (130 kDa), GalT (predicted band around 43 kDa), Rab5 (25 kDa), Rab 9 (23 kDa), LC3-II (predicted band around 17 kDa) and  $\beta$ act (43 kDa) measured in the whole homogenate of the medial prefrontal cortex (mPFC) of  $DAT^{+/+}$  and  $DAT^{-/-}$  rats.

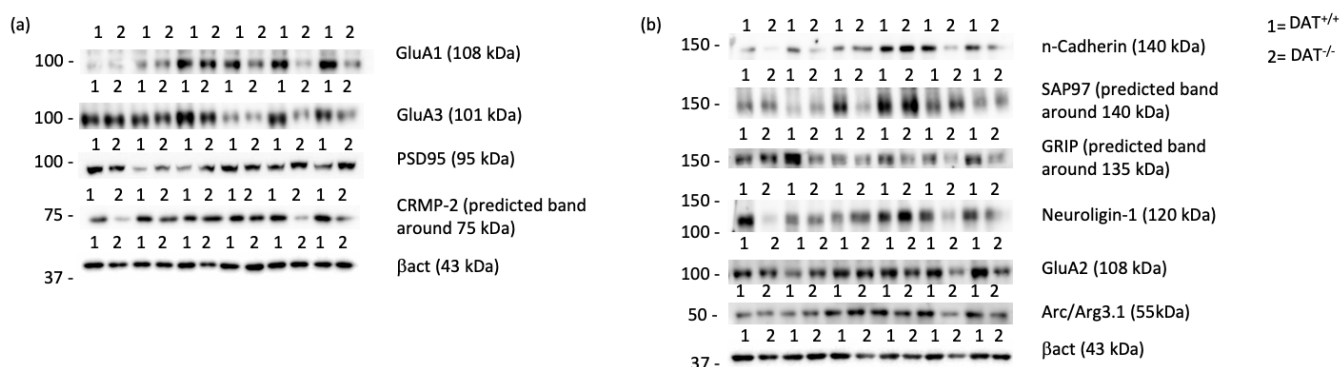

**Figure S2.** (a) Examples of full-size cropped immunoblots related to the expression levels of GluA1 (108 kDa), GluA3 (101 kDa), PSD95 (95 kDa), CRMP-2 (predicted band around 75 kDa) and  $\beta$ act (43 kDa); (b) examples of full-size cropped immunoblots related to the expression levels of n-Cadherin (140 kDa), SAP97 (predicted band around 140 kDa), GRIP (predicted band around 135 kDa), Neuroligin-1 (120 kDa), GluA2 (108 kDa), Arc/Arg3.1 (55 kDa) and  $\beta$ act (43 kDa) measured in the post-synaptic density of medial prefrontal cortex (mPFC) of  $DAT^{+/+}$  and  $DAT^{-/-}$  rats.

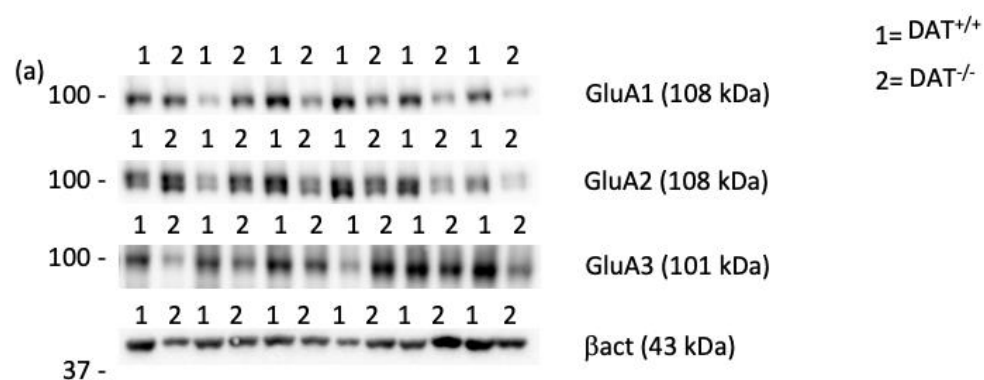

**Figure S3.** (a) Examples of full-size cropped immunoblots related to the expression levels of GluA1 (108 kDa), GluA2 (108 kDa), GluA3 (101 kDa) and βact (43 kDa) measured in the extra-synaptic fraction of medial prefrontal cortex (mPFC) of DAT<sup>+/+</sup> and DAT<sup>-/-</sup> rats.
